# Supplementary material
Source: Springer Nature journal article supplement (https://www.springermedizin.de/resource/supplementary/13002_2012_285_MOESM1_ESM.pdf/9627564)
Supplement: MOESM1 [file 9627564]

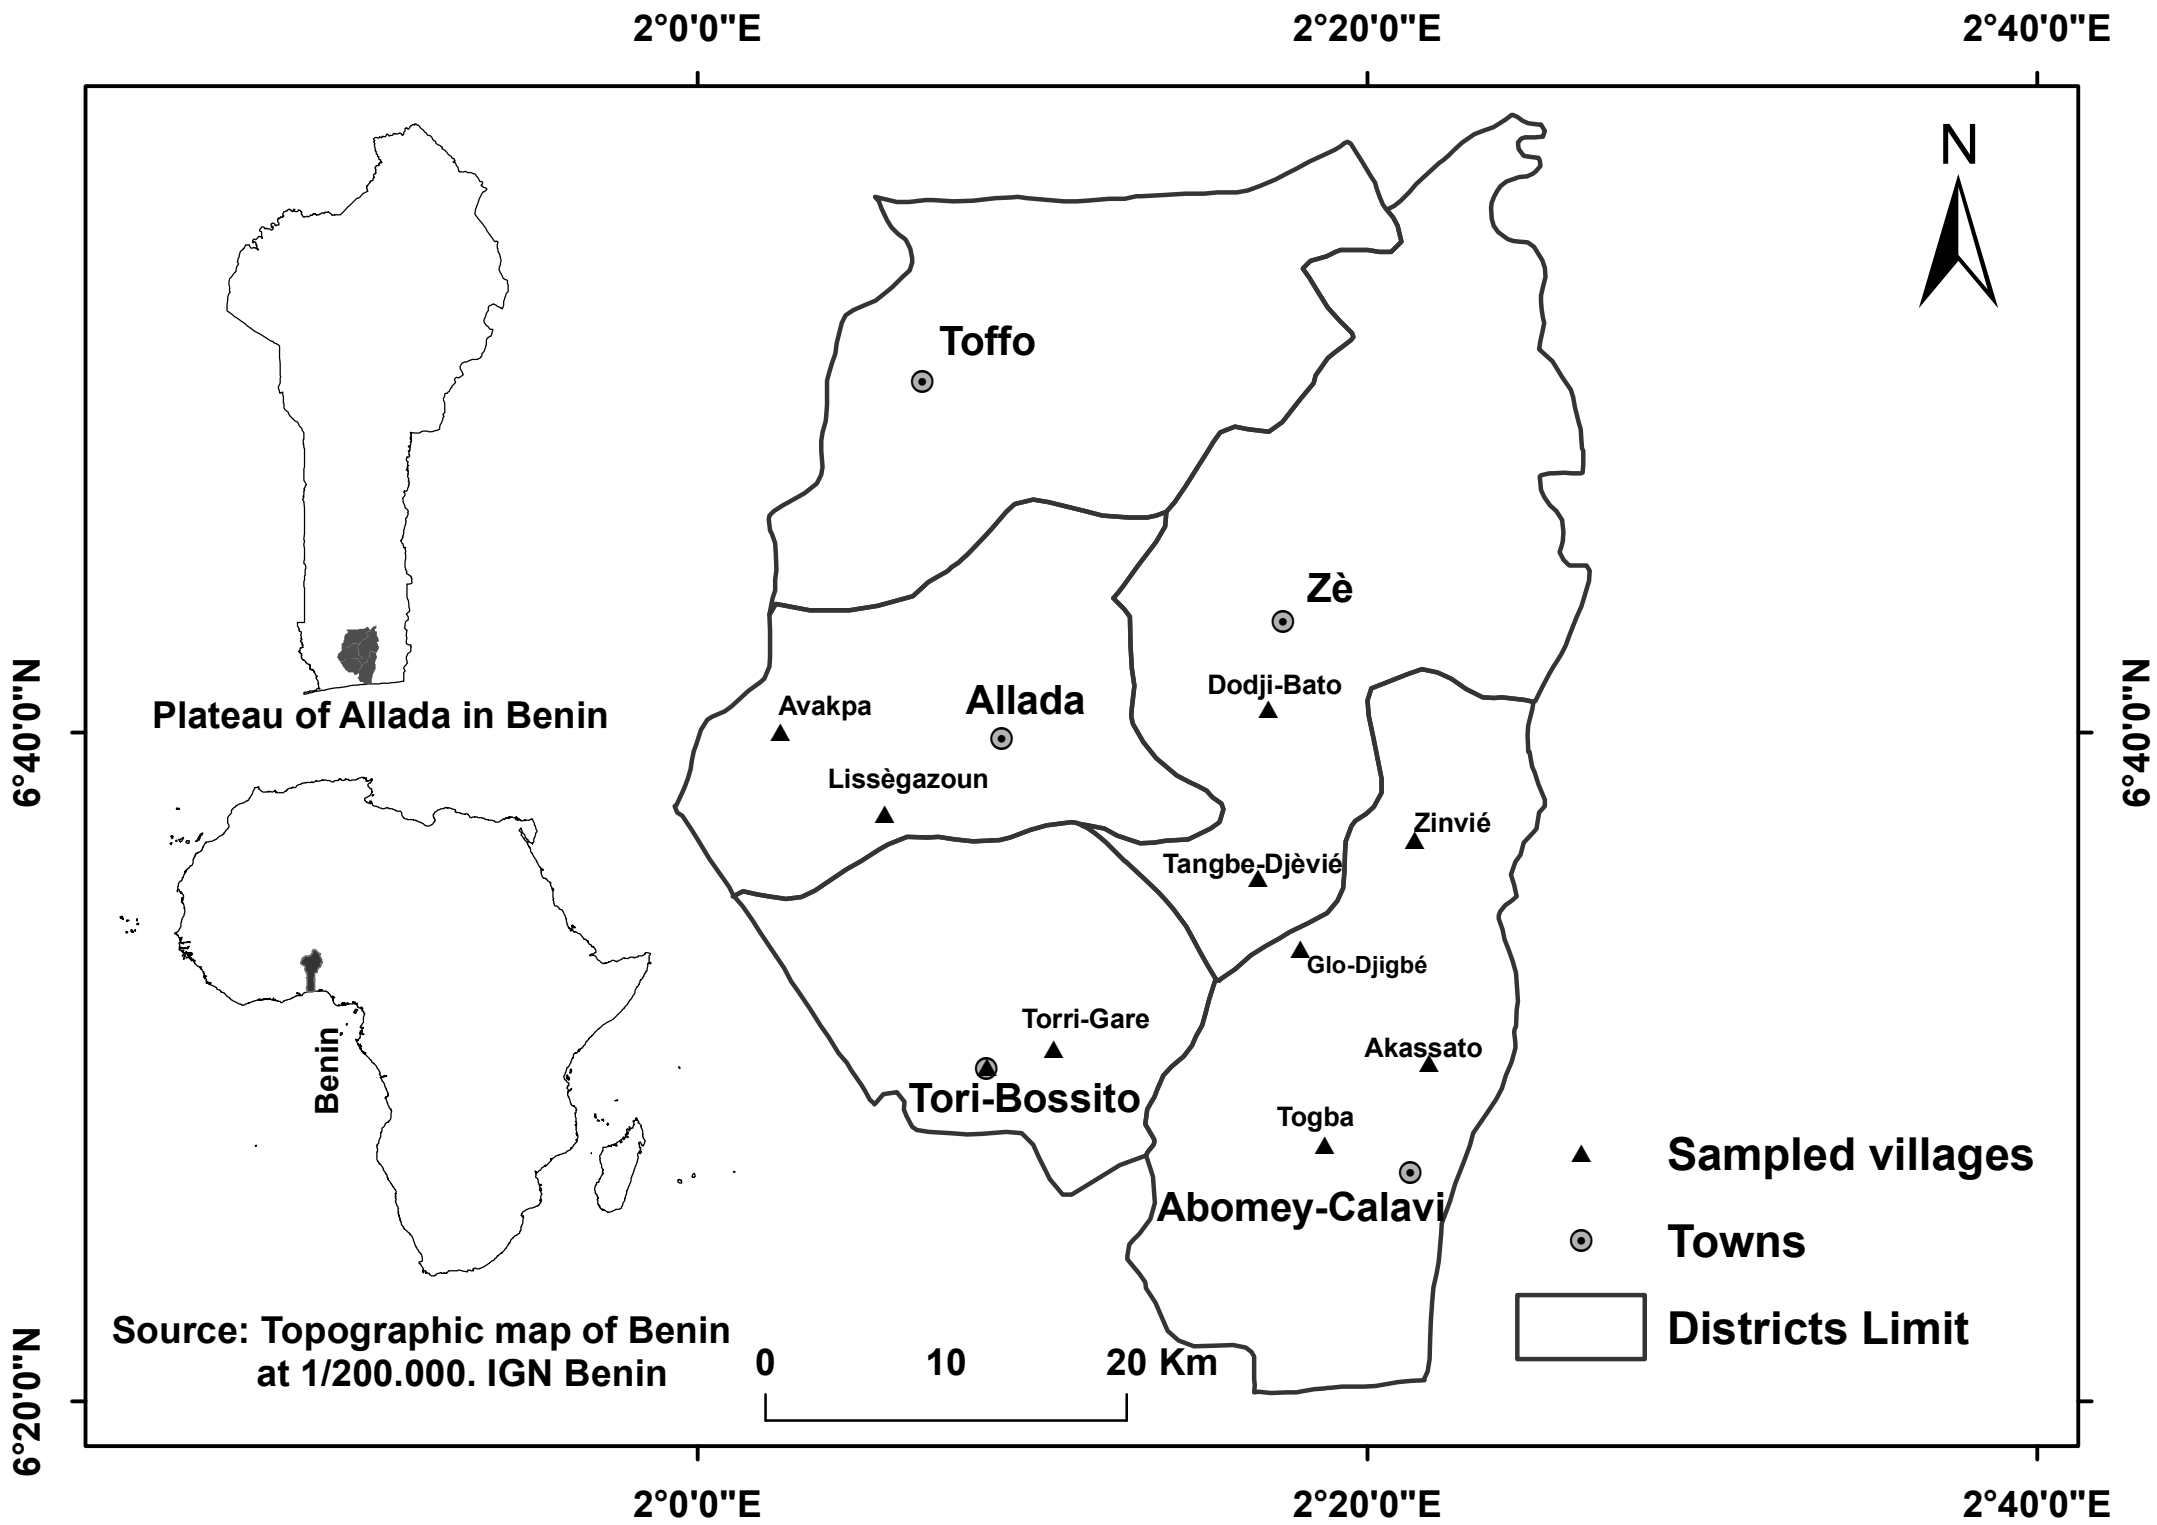

2°0'0"E

2°20'0"E

2°40'0"E

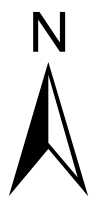

6°40'0"N

6°40'0"N

6°20'0"N

2°0'0"E

2°20'0"E

2°40'0"E

Plateau of Allada in Benin

Benin

Source: Topographic map of Benin at 1/200.000. IGN Benin

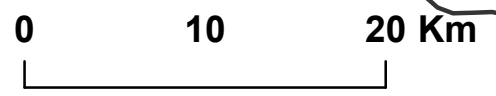

- ▲ Sampled villages
- Towns
- Districts Limit
